# Supplementary material for: Feasibility of Arterial Spin Labeling Magnetic Resonance Imaging for Musculoskeletal Tumors with Optimized Post-Labeling Delay
Source: MDPI journal article supplement (doi:10.3390/diagnostics12102450), 2022-10-10
Supplement: s1 [file s1]

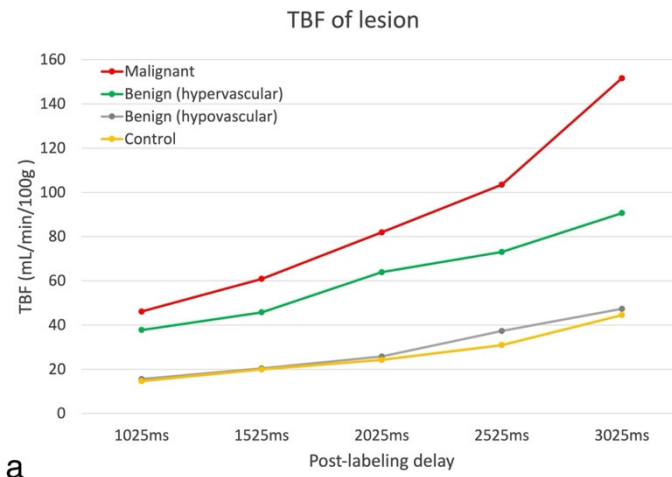

**a**

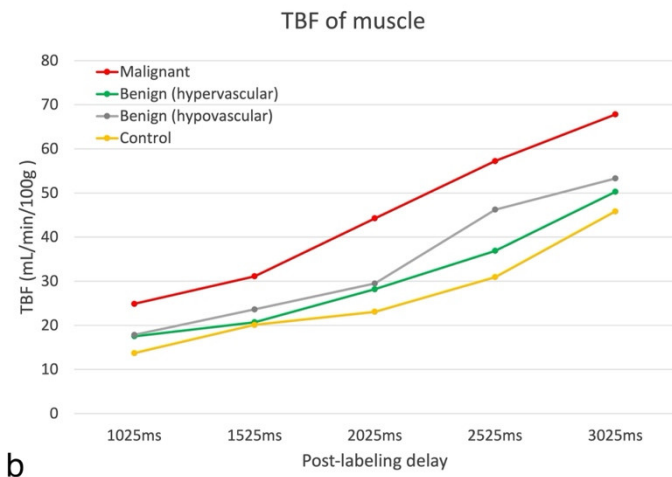

**b**

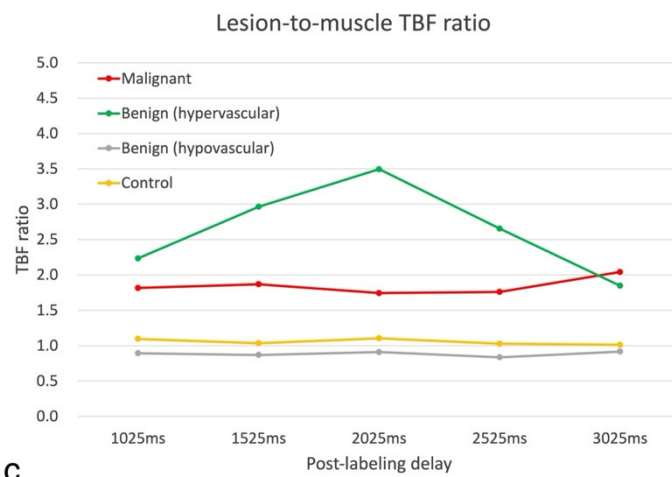

**c**

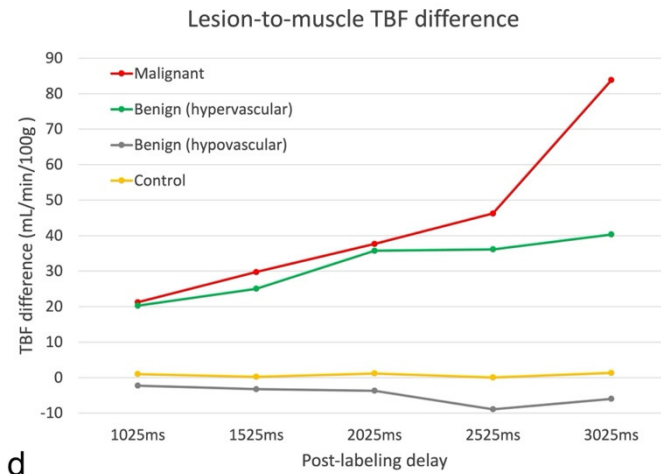

**Figure S1.** The mean TBF values in the patients without spiral artifacts. The mean TBF values of lesions (a) and normal muscles (b), the lesion-to-muscle differences (c) and the lesion-to-muscle TBF ratios (d) of the malignant group, the hypervascular benign group, the hypovascular benign group and the control group in different post-labeling delay time.
