# Supplementary material for: Feasibility of Arterial Spin Labeling Magnetic Resonance Imaging for Musculoskeletal Tumors with Optimized Post-Labeling Delay
Source: MDPI journal article supplement (doi:10.3390/diagnostics12102450), 2022-10-10
Supplement: s1 [file s1]

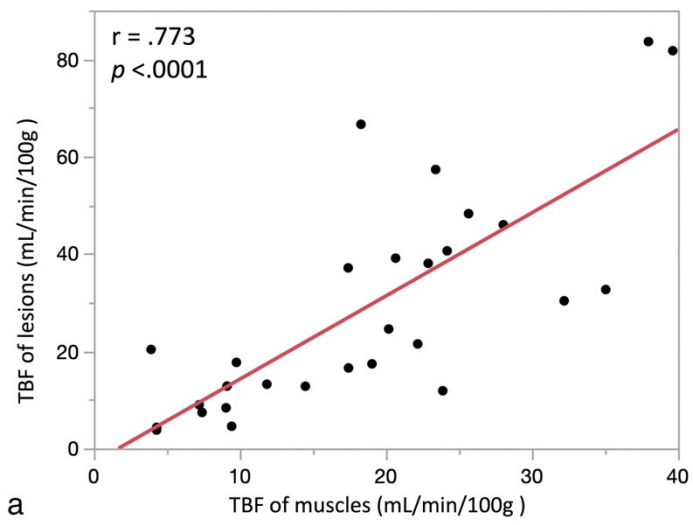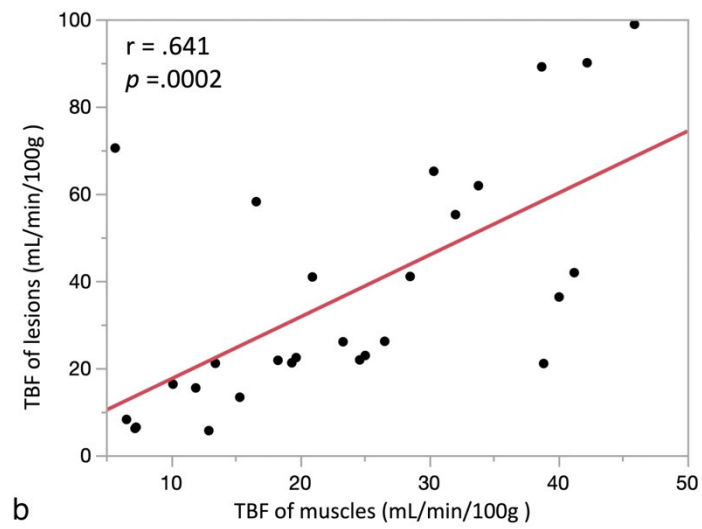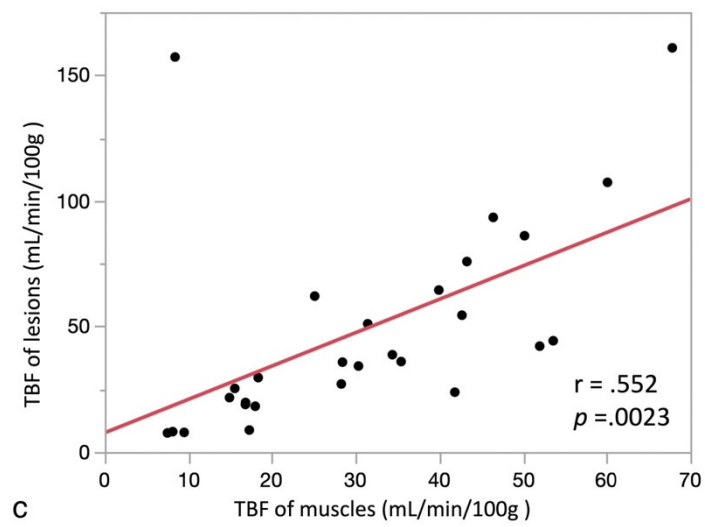

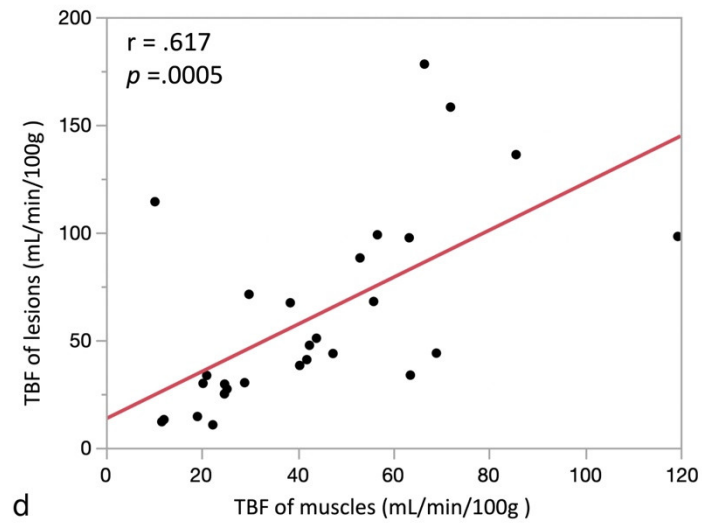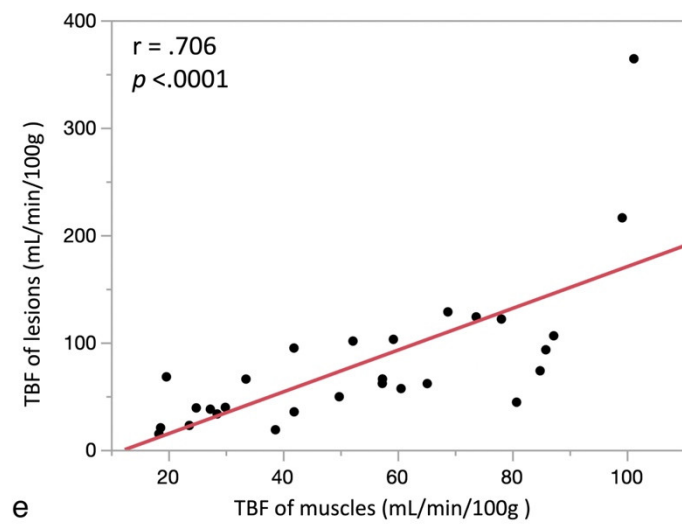

**Figure S2.** Relation between the mean TBF values of lesions and muscles in patients without spiral artifacts. Relation between the mean TBF values of lesions and muscles in the different PLD groups (a: PLD=1025ms; b: PLD=1525ms; c: PLD=2025ms; d: PLD=2525ms; e: PLD=3025ms).
