# Supplementary material for: Feasibility of Arterial Spin Labeling Magnetic Resonance Imaging for Musculoskeletal Tumors with Optimized Post-Labeling Delay
Source: MDPI journal article supplement (doi:10.3390/diagnostics12102450), 2022-10-10
Supplement: s1 [file s1]

**Table S1.** Imaging criteria for diagnosis of the benign lesions in this study.

| Diagnosis                 | Imaging Diagnosis Criteria                                                                                                                                                                                                                          |
|---------------------------|-----------------------------------------------------------------------------------------------------------------------------------------------------------------------------------------------------------------------------------------------------|
| <b>Soft Tissue Tumors</b> |                                                                                                                                                                                                                                                     |
| Schwannoma                | General features: <ul style="list-style-type: none"> <li>. Well-defined mass</li> <li>. Fusiform mass eccentrically positioned in relation to parent nerve</li> <li>. Fat-split sign (+)</li> </ul>                                                 |
|                           | T1: <ul style="list-style-type: none"> <li>. Homogeneously isointense to slightly hyperintense relative to muscle</li> </ul>                                                                                                                        |
|                           | T2 with fat suppression: <ul style="list-style-type: none"> <li>. Heterogeneously hyperintense to muscle</li> </ul>                                                                                                                                 |
| Hemangioma                | Post-enhanced T1 with fat suppression: <ul style="list-style-type: none"> <li>. Heterogeneously intense enhancement</li> </ul>                                                                                                                      |
|                           | General features: <ul style="list-style-type: none"> <li>. Well-defined mass</li> <li>. Maybe lobulated</li> <li>. Commonly have intralesional fat and phleboliths</li> </ul>                                                                       |
|                           | T1: <ul style="list-style-type: none"> <li>. Isointense or hypointense to muscle on T1-weighted imaging</li> <li>. Intralesional hyperintense component (fat)</li> </ul>                                                                            |
| Lipoma                    | T2: <ul style="list-style-type: none"> <li>. Heterogeneously hyperintense on T2-weighted images</li> <li>. Intralesional hypointense nodule (phleboliths)</li> </ul>                                                                                |
|                           | Post-enhanced T1 with fat suppression: <ul style="list-style-type: none"> <li>. Gradually intense enhancement</li> </ul>                                                                                                                            |
|                           | General features: <ul style="list-style-type: none"> <li>. Well-defined mass</li> </ul>                                                                                                                                                             |
| Cyst                      | MRI: <ul style="list-style-type: none"> <li>. Homogeneously hyperintense on non-fat-suppressed images</li> <li>. Homogeneously hypointense on fat-suppressed images</li> <li>. No significant enhancement</li> </ul>                                |
|                           | General features: <ul style="list-style-type: none"> <li>. Well-defined mass</li> </ul>                                                                                                                                                             |
|                           | T1: <ul style="list-style-type: none"> <li>. Homogeneously and significantly hypointense</li> </ul>                                                                                                                                                 |
|                           | T2: <ul style="list-style-type: none"> <li>. Homogeneously hyperintense</li> </ul>                                                                                                                                                                  |
|                           | Post-enhanced T1 with fat suppression: <ul style="list-style-type: none"> <li>. No enhancement or mild capsular enhancement</li> </ul>                                                                                                              |
|                           |                                                                                                                                                                                                                                                     |
| <b>Bone tumors</b>        |                                                                                                                                                                                                                                                     |
| Fibrous dysplasia         | General features: <ul style="list-style-type: none"> <li>. Elongated, mildly expansile lesion in long bone</li> <li>. Well-defined lesion</li> <li>. Variable internal sclerosis depending on the underlying constituents</li> </ul>                |
|                           | T1: <ul style="list-style-type: none"> <li>. Homogeneously, isointense to slightly hyperintense relative to muscle</li> </ul>                                                                                                                       |
|                           | T2: <ul style="list-style-type: none"> <li>. Variable T2 signal changes ranging from hypointense regions to areas of hyperintense signal, including chondroid elements and areas of cystic change</li> <li>. No surrounding marrow edema</li> </ul> |
| Enchondroma               | Post-enhanced T1 with fat suppression: <ul style="list-style-type: none"> <li>. Enhancement in the areas with high T2-weighted intensity</li> </ul>                                                                                                 |
|                           | General features: <ul style="list-style-type: none"> <li>. Geographic, well-defined, osteolytic mass</li> </ul>                                                                                                                                     |
|                           |                                                                                                                                                                                                                                                     |

- . Lobular morphology.
- . Usually with matrix mineralization (calcification)

T1:

- . Isointensity to hypointensity relative to muscle
- . Intermixed with areas of hypointensity corresponding to matrix mineralization

T2:

- . Hyperintensity relative to muscle
- . Intermixed with areas of hypointensity corresponding to matrix mineralization
- . No surrounding marrow edema

Post-enhanced T1 with fat suppression:

- . No significant enhancement or subtle enhancement around calcifications
  - . May have septal and peripheral (multilobular rim-like) gadolinium enhancement (should rule out chondrosarcoma)
-
