# Supplementary material for: Feasibility of Arterial Spin Labeling Magnetic Resonance Imaging for Musculoskeletal Tumors with Optimized Post-Labeling Delay
Source: MDPI journal article supplement (doi:10.3390/diagnostics12102450), 2022-10-10
Supplement: s1 [file s1]

**Table S2.** Details of pathological diagnosis of the malignant group in the patients without spiral artifacts.

| <b>Diagnosis</b>                                  | <b>N</b> | <b>Location (N)</b>  |
|---------------------------------------------------|----------|----------------------|
| Atypical lipomatous tumor (borderline malignancy) | 1        | Left thigh (1)       |
| Liposarcoma, well-differentiated                  | 1        | Left thigh (1)       |
| Pleomorphic rhabdomyosarcoma                      | 1        | Left thigh (1)       |
| Myxofibrosarcoma                                  | 1        | Right thigh (1)      |
| Lymphoma                                          | 1        | Right iliac bone (1) |
| Metastasis                                        | 1        | Right iliac bone (1) |
