# Supplementary material for: Feasibility of Arterial Spin Labeling Magnetic Resonance Imaging for Musculoskeletal Tumors with Optimized Post-Labeling Delay
Source: MDPI journal article supplement (doi:10.3390/diagnostics12102450), 2022-10-10
Supplement: s1 [file s1]

**Table S3.** Details of pathological and imaging diagnosis of the benign groups in the patients without spiral artifacts.

| Diagnosis                   | N  | Method    | Location (N)             |
|-----------------------------|----|-----------|--------------------------|
| Hypervascular benign lesion | 7  |           |                          |
| Schwannoma                  | 3  | Pathology | Right hip (1)            |
|                             |    | MRI       | Right leg (2)            |
| Hemangioma                  | 3  | Pathology | Right foot (1)           |
|                             |    | MRI       | Right lower leg (2)      |
| Fibrous dysplasia           | 1  | MRI       | Left femur (1)           |
| Hypovascular benign lesion  | 15 |           |                          |
| Intramuscular myxoma        | 1  | Pathology | Right hip (1)            |
| Lipoma                      | 5  | Pathology | Right gluteal region (1) |
|                             |    | MRI       | Right thigh (2)          |
|                             |    |           | Left thigh (2)           |
|                             |    |           | Left foot (1)            |
| Cyst                        | 3  | MRI       | Left knee (1)            |
|                             |    |           | Right ankle (1)          |
| Enchondroma                 | 1  | MRI       | Right tibia (1)          |
| Necrosis                    | 1  | Pathology | Right thigh (1)          |
|                             |    |           | Right knee (1)           |
| Synovial chondromatosis     | 2  | Pathology | Left knee (1)            |
| Amyloidosis                 | 1  | Pathology | Left lower leg (1)       |
| Gouty arthritis             | 1  | Pathology | Left knee (1)            |
