# Supplementary material for: Feasibility of Arterial Spin Labeling Magnetic Resonance Imaging for Musculoskeletal Tumors with Optimized Post-Labeling Delay
Source: MDPI journal article supplement (doi:10.3390/diagnostics12102450), 2022-10-10
Supplement: s1 [file s1]

**Table S5.** Difference of the TBF of lesions and muscles in the patients without spiral artifacts. Paired t-test for difference of the mean TBF values of lesions and muscles in four groups with different PLD in the patients without spiral artifacts.

|        | <b>Malignant</b> | <b>Hypervascular Benign</b> | <b>Hypovascular Benign</b> | <b>Control</b> |
|--------|------------------|-----------------------------|----------------------------|----------------|
| PLD    | <i>p</i>         | <i>p</i>                    | <i>p</i>                   | <i>p</i>       |
| 1025ms | 0.0342*          | 0.0101*                     | 0.0953                     | 0.6345         |
| 1525ms | 0.0288*          | 0.0159*                     | 0.1148                     | 0.9384         |
| 2025ms | 0.0628           | 0.0495*                     | 0.1558                     | 0.6369         |
| 2525ms | 0.0613           | 0.0206*                     | 0.0505                     | 0.9975         |
| 3025ms | 0.1407           | 0.0084*                     | 0.2153                     | 0.7358         |

\*  $p < .05$  indicates a significant difference between the mean TBF values of lesions and muscles.
