# Supplementary material for: Feasibility of Arterial Spin Labeling Magnetic Resonance Imaging for Musculoskeletal Tumors with Optimized Post-Labeling Delay
Source: MDPI journal article supplement (doi:10.3390/diagnostics12102450), 2022-10-10
Supplement: s1 [file s1]

**Table S4.** TBF and TBF difference and ratio in the patients without spiral artifacts. TBF of lesions and normal muscles and lesion-to-muscle TBF difference and ratio in the post-Labeling delay of 1025ms to 3025 ms and the *p* value between the malignant, hypervascular benign, hypovascular benign and control groups in the patients without spiral artifacts.

|                          | Malignant       | Hypervascular Benign | Hypovascular Benign | Control       | M-B    | M-L     | M-N     | B-L     | B-N     | L-N    |
|--------------------------|-----------------|----------------------|---------------------|---------------|--------|---------|---------|---------|---------|--------|
| PLD=1025ms               |                 |                      |                     |               |        |         |         |         |         |        |
| Lesion TBF (mL/min/100g) | 46.07 ± 22.37   | 37.75 ± 27.87        | 15.55 ± 10.12       | 14.65 ± 9.27  | 0.8398 | 0.0201  | 0.0142  | 0.0526  | 0.0357  | 0.9995 |
| Muscle TBF (mL/min/100g) | 24.86 ± 8.32    | 17.51 ± 11.92        | 17.82 ± 10.73       | 13.69 ± 6.86  | 0.5347 | 0.5549  | 0.1650  | 0.9999  | 0.8173  | 0.7654 |
| Dif_TBF (mL/min/100g)    | 21.21 ± 15.01   | 20.24 ± 18.14        | -2.27 ± 3.85        | 0.97 ± 6.53   | 0.9988 | 0.0041* | 0.0135  | 0.0010* | 0.0040* | 0.9166 |
| TBF ratio                | 1.82 ± 0.40     | 2.23 ± 1.39          | 0.89 ± 0.23         | 1.09 ± 0.40   | 0.7632 | 0.1450  | 0.3164  | 0.0033* | 0.0120* | 0.9309 |
| PLD=1525ms               |                 |                      |                     |               |        |         |         |         |         |        |
| Lesion TBF (mL/min/100g) | 60.83 ± 29.69   | 45.72 ± 31.16        | 20.36 ± 12.46       | 19.88 ± 9.74  | 0.5752 | 0.0070* | 0.0054* | 0.0600  | 0.0471  | 0.9999 |
| Muscle TBF (mL/min/100g) | 31.10 ± 10.27   | 20.68 ± 13.44        | 23.60 ± 13.37       | 20.08 ± 9.49  | 0.4091 | 0.6603  | 0.3308  | 0.9502  | 0.9995  | 0.9046 |
| Dif_TBF (mL/min/100g)    | 29.73 ± 19.90   | 25.04 ± 24.66        | -3.24 ± 5.87        | -0.20 ± 8.19  | 0.9476 | 0.0027* | 0.0060* | 0.0021* | 0.0053* | 0.9691 |
| TBF ratio                | 1.87 ± 0.45     | 2.96 ± 3.60          | 0.87 ± 0.24         | 1.03 ± 0.32   | 0.7147 | 0.7577  | 0.8367  | 0.0856  | 0.1149  | 0.9969 |
| PLD=2025ms               |                 |                      |                     |               |        |         |         |         |         |        |
| Lesion TBF (mL/min/100g) | 81.89 ± 48.39   | 63.90 ± 48.28        | 25.76 ± 14.33       | 24.20 ± 12.20 | 0.7424 | 0.0150  | 0.0105* | 0.0629  | 0.0433  | 0.9995 |
| Muscle TBF (mL/min/100g) | 44.23 ± 15.87   | 28.17 ± 17.76        | 29.47 ± 16.82       | 23.05 ± 11.24 | 0.2611 | 0.6155  | 0.0714  | 0.9978  | 0.8800  | 0.7759 |
| Dif_TBF (mL/min/100g)    | 37.66 ± 32.92   | 35.73 ± 46.34        | -3.70 ± 7.56        | 1.14 ± 7.80   | 0.9992 | 0.0417  | 0.0788  | 0.0168  | 0.0369  | 0.9762 |
| TBF ratio                | 1.74 ± 0.40     | 3.49 ± 5.72          | 0.91 ± 0.27         | 1.10 ± 0.30   | 0.7069 | 0.9532  | 0.9769  | 0.2378  | 0.2825  | 0.9987 |
| PLD=2525ms               |                 |                      |                     |               |        |         |         |         |         |        |
| Lesion TBF (mL/min/100g) | 103.45 ± 53.17  | 73.01 ± 47.82        | 37.29 ± 25.71       | 30.89 ± 15.99 | 0.4175 | 0.0086* | 0.0031* | 0.1409  | 0.0548  | 0.9750 |
| Muscle TBF (mL/min/100g) | 57.23 ± 19.23   | 36.87 ± 22.69        | 46.21 ± 31.90       | 30.89 ± 15.12 | 0.4174 | 0.8261  | 0.1811  | 0.8219  | 0.9410  | 0.4526 |
| Dif_TBF (mL/min/100g)    | 46.22 ± 40.05   | 36.13 ± 37.66        | -8.92 ± 12.51       | -0.01 ± 7.61  | 0.8899 | 0.0020* | 0.0097* | 0.0027* | 0.0164  | 0.8500 |
| TBF ratio                | 1.76 ± 0.57     | 2.65 ± 3.23          | 0.84 ± 0.23         | 1.03 ± 0.24   | 0.7708 | 0.7436  | 0.8463  | 0.1029  | 0.1526  | 0.9936 |
| PLD=3025ms               |                 |                      |                     |               |        |         |         |         |         |        |
| Lesion TBF (mL/min/100g) | 151.59 ± 121.14 | 90.58 ± 58.19        | 47.32 ± 25.07       | 44.49 ± 24.69 | 0.2288 | 0.0097* | 0.0067* | 0.3518  | 0.2798  | 0.9994 |
| Muscle TBF (mL/min/100g) | 67.79 ± 19.65   | 50.26 ± 28.43        | 53.29 ± 26.12       | 45.80 ± 24.05 | 0.6072 | 0.7253  | 0.3889  | 0.9937  | 0.9792  | 0.9051 |
| Dif_TBF (mL/min/100g)    | 83.80 ± 102.21  | 40.32 ± 34.78        | -5.98 ± 14.18       | -1.30 ± 12.47 | 0.2686 | 0.0026* | 0.0038* | 0.0990  | 0.1451  | 0.9941 |
| TBF ratio                | 2.04 ± 0.93     | 1.85 ± 0.73          | 0.92 ± 0.30         | 1.01 ± 0.23   | 0.9182 | 0.0035* | 0.0071* | 0.0040* | 0.0090* | 0.9773 |

M-B = comparison between the malignant group and hypervascular benign group. M-L = comparison between the malignant group and hypovascular benign group. M-N = comparison between the malignant group and control group. B-L = comparison between the hypervascular benign group and hypovascular benign group. B-N = comparison between the hypervascular benign group and control group. L-N = comparison between the hypovascular benign group and control group. \* *p* < .0125 indicates a significant difference between the malignant, hypervascular benign, hypovascular benign and control groups.
