# Supplementary material for: Feasibility of Arterial Spin Labeling Magnetic Resonance Imaging for Musculoskeletal Tumors with Optimized Post-Labeling Delay
Source: Diagnostics (Basel). 2022 Oct 10;12(10):2450. doi: 10.3390/diagnostics12102450 (PMC9600497; doi:10.3390/diagnostics12102450)
Supplement: Supplementary file 1 [file diagnostics-12-02450-s001.zip]

Archive with 7 entries (7 files):
- Figure S1 mean TBF values in the patients without spinal artifacts.pdf
- Figure S2 relation between TBF values in the patients without spinal artifacts.pdf
- Table S1 Imaging criteria for diagnosis of the benign lesions.pdf
- Table S2 Details of pathological diagnosis of the malignant group in the patients without spiral artifacts.pdf
- Table S3 Details of diagosis of the benign groups in the patients without spiral artifacts.pdf
- Table S4 TBF and TBF difference and ratio in the patients without spiral artifacts.pdf
- Table S5 difference of the TBF of lesions and muscles in the patients without spiral artifacts.pdf
